# Supplementary material
Source: PubMed Central journal article supplement (PMC5736104)
Supplement: NIHMS73298-supplement-Supplementary_Figure_1.pdf [file NIHMS73298-supplement-Supplementary_Figure_1.pdf]

Ext Data Fig 1b

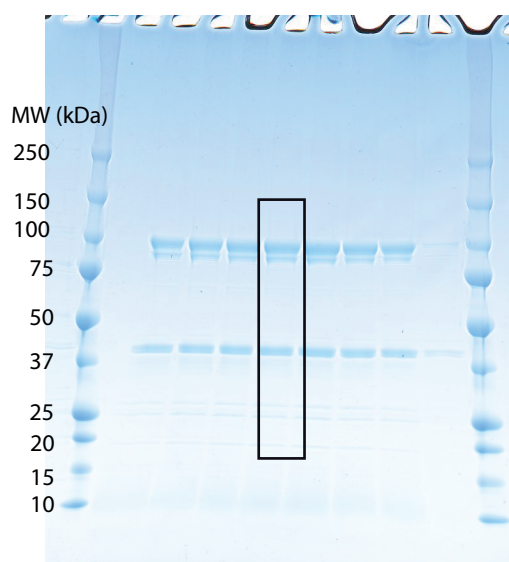

Uncropped scan of SDS-PAGE, stained with Coomassie blue. The box indicates the peak fraction of the Hrd1/Hrd3 complex after gel filtration on a Superdex 200 10/300GL Increase column.
